# Supplementary material for: Peripartum Takotsubo Cardiomyopathy: A Review and Insights from a National Registry
Source: MDPI journal article supplement (doi:10.3390/jcdd11020037), 2024-01-25
Supplement: s1 [file s1]

Table 1.

| Patient n° | Source                  | Age | Race             | CVRFs | Hypertensive states in pregnancy | Trigger (physical/stress/not clarified)        | Initial LVEF | Recovery of LVEF** | Pattern        | Initial symptoms                | Repolarization abnormalities on admission ECG*** | Vasoactive support during/after delivery | Complications during acute phase                           | Follow-up (days) |
|------------|-------------------------|-----|------------------|-------|----------------------------------|------------------------------------------------|--------------|--------------------|----------------|---------------------------------|--------------------------------------------------|------------------------------------------|------------------------------------------------------------|------------------|
| 1          | RETAKO                  | 41  | White            | Yes   | Hypertension in pregnancy        | Psychological (sadness)                        | 45           | >3                 | Apical         | Angina                          | TWI, STE                                         | No                                       | No                                                         | 5383             |
| 2          | RETAKO                  | 40  | White            | No    | No                               | Physical (puerperal fever)                     | 38           | >3                 | Global         | Dyspnea                         | No                                               | No                                       | No                                                         | 787              |
| 3          | RETAKO                  | 36  | Black            | No    | No                               | Physical (Autoimmune nephropathy and abortion) | 44           | 1                  | Apical         | Angina and dyspnea              | STD                                              | Yes                                      | Acute pulmonary edema, electromechanical dissociation, OTI | 236              |
| 4          | RETAKO                  | 35  | South-American   | No    | No                               | Physical (caesarean-section)                   | 55           | 3                  | Basal          | Dyspnea                         | TWI                                              | No                                       | No                                                         | 956              |
| 5          | RETAKO                  | 39  | White            | No    | No                               | Physical (caesarean-section)                   | 48           | >3                 | Midventricular | Dyspnea                         | TWI                                              | No                                       | Acute pulmonary edema after caesarean section              | 317              |
| 6          | RETAKO                  | 41  | White            | No    | No                               | Physical (ischaemic stroke in puerperium)      | 40           | 1                  | Basal          | No                              | No                                               | No                                       | No                                                         | 323              |
| 7          | Tomida et al.           | 35  | Asian (japanese) | No    | No                               | Physical (caesarean-section)                   | 20           | 3                  | Midventricular | Dyspnea                         | No                                               | Yes                                      | Cardiogenic shock                                          | 150              |
| 8          | Ghariani et al.         | 30  | Arab             | No    | No                               | Physical (uterine bleeding)                    | 25           | 1                  | Basal          | Dyspnea                         | No                                               | Yes                                      | OTI                                                        | 21               |
| 9          | Gabarre et al.          | 38  | White            | No    | No                               | Physical (HELLP syndrome)                      | 45           | 1                  | Basal          | Headache, atypical pain         | No                                               | No                                       | HELLP                                                      | 90               |
| 10         | Kandah et al.           | 35  | Black            | Yes   | Pre-eclampsia                    | Physical (postpartum stress)                   | 60           | 1                  | Apical         | Angina and dyspnea              | No                                               | No                                       | No                                                         | N/A              |
| 11         | Jih et al.              | 33  | White            | No    | No                               | Physical (post-abortion sepsis)                | 32           | N/A                | Global         | Dyspnea                         | VT                                               | Yes                                      | No                                                         | 42               |
| 12         | Kourkovi et al.         | 33  | White            | No    | No                               | Physical (caesarean-section)                   | 35           | 1                  | Basal          | Dyspnea and atypical chest pain | No                                               | No                                       | Acute pulmonary edema after caesarean section              | 30               |
| 13         | Horie et al.            | 44  | Asian (japanese) | Yes   | Pre-eclampsia                    | Not clarified                                  | 31           | 1                  | Apical         | Dyspnea and anasarca            | TWI                                              | Yes                                      | Acute pulmonary edema                                      | 180              |
| 14         | Oindi et al.            | 35  | Asian (indian)   | No    | Pre-eclampsia                    | Physical (pre-eclampsia)                       | 48           | 1                  | Apical         | Angina and dyspnea              | STE                                              | No                                       | No                                                         | 180              |
| 15         | Ruiz et al.             | 39  | White            | No    | No                               | Physical (caesarean-section)                   | 48           | 3                  | Basal          | Dyspnea                         | TWI                                              | No                                       | No                                                         | 90               |
| 16         | Ledakowicz-Polak et al. | 36  | White            | No    | No                               | Physical (caesarean-section)                   | 30           | 1                  | Basal          | Dyspnea                         | STE, STD                                         | Yes                                      | Acute pulmonary edema after caesarean section              | 365              |
| 17         | Hamandachi et al.       | 30  | White            | No    | No                               | Not clarified                                  | 27           | 1                  | Basal          | Atypical chest pain             | TWI                                              | No                                       | No                                                         | 30               |
| 18         | Wu et al.               | 33  | Asian (japanese) | No    | No                               | Physical (postpartum haemorrhage)              | 30           | 1                  | Apical         | Cardiogenic shock               | STE                                              | Yes                                      | Yes, ECMO and LVAD due to cardiogenic shock                | 365              |

Table 1. Continuation

| Patient n° | Source            | Age   | Race             | CVRFs | Hypertensive states in pregnancy   | Trigger (physical/stress/not clarified)         | Initial LVEF | Recovery of LVEF**        | Pattern                         | Initial symptoms                | Repolarization abnormalities on admission ECG*** | Vasoactive support during/after delivery | Complications during acute phase | Follow-up (days) |
|------------|-------------------|-------|------------------|-------|------------------------------------|-------------------------------------------------|--------------|---------------------------|---------------------------------|---------------------------------|--------------------------------------------------|------------------------------------------|----------------------------------|------------------|
| 19         | Minatoguchi et al | 24    | Asian (japanese) | No    | No                                 | Physical (caesarean-section)                    | 46           | 1                         | Basal                           | Dyspnea                         | No                                               | No                                       | No                               | N/A              |
| 20         | Parodi et al      | 32    | White            | No    | No                                 | Physical (anaesthesia during caesarean section) | 30           | 1                         | Apical                          | Dyspnea                         | TWI                                              | Yes                                      | Pulmonary edema and IABP         | 365              |
| 21         | Yaqub et al       | 32    | White            | No    | No                                 | Psychological (postpartum depression)           | 45           | 3                         | Apical                          | Angina                          | STE                                              | No                                       | No                               | 42               |
| 22         | Citro et al       | 42    | White            | No    | No                                 | Physical (ergonovine injection)                 | 30           | 1                         | Midventricular                  | Angina                          | TWI                                              | Yes                                      | Respiratory distress and OTI     | 365              |
| 23         | Sahng Lee et al   | 30    | Asian (japanese) | No    | No                                 | Physical (caesarean section)                    | 35           | 1                         | Basal                           | Dyspnea and atypical chest pain | TWI                                              | No                                       | No                               | 14               |
| 24         | Sato et al        | 41    | Asian (japanese) | No    | No                                 | Physical (caesarean section)                    | 28           | 1                         | Apical                          | Dyspnea                         | STE                                              | Yes                                      | Acute pulmonary edema and OTI    | N/A              |
| 25         | Jo et al          | 37    | Asian (japanese) | No    | No                                 | Physical (caesarean section)                    | 14           | 3                         | Apical                          | Angina and dyspnea              | TWI                                              | Yes                                      | ECMO                             | 180              |
| 26         | D'Agostino et al  | 42    | White            | Yes   | No                                 | Psychological (posttraumatic stress)            | 42           | 1                         | Apical                          | Angina and dyspnea              | STE                                              | No                                       | No                               | 60               |
| 27         | Citro et al       | 35    | White            | No    | No                                 | Physical (vaginal delivery)                     | 30           | 1                         | Midventricular                  | Dyspnea                         | TWI                                              | Yes                                      | IABP due to hypotension          | 180              |
| 28         | Citro et al       | 24    | White            | No    | No                                 | Physical (caesarean section)                    | 30           | 1                         | Midventricular and basal        | Dyspnea and palpitations        | STD                                              | Yes                                      | IABP and OTI                     | 180              |
| 29         | Ashrafpoor et al  | 34    | White            | No    | No                                 | Physical (caesarean section)                    | 36           | 3                         | Midventricular and basal        | Dyspnea and atypical chest pain | No                                               | No                                       | No                               | 90               |
| 30         | D'Amato et al     | 32    | White            | No    | No                                 | Psychological (anxiety)                         | 22           | 1                         | Apical                          | Cardiac arrest                  | VF                                               | Yes                                      | Abortion due to TTS              | N/A              |
| 31         | Muller et al      | 30    | White            | No    | No                                 | Physical (postpartum stress)                    | N/A          | 1                         | Basal                           | Angina                          | STD                                              | No                                       | No                               | 300              |
| 32         | Zdanowicz et al   | 32    | White            | Yes   | Hypertension in pregnancy          | Physical (spinal anaesthesia)                   | 56           | 1                         | Midventricular                  | Angina                          | STE                                              | Yes                                      | IABP and stroke                  | 90               |
| 33         | Kim et al (n=10)  | 31,3* | Asian (korean)   | N/A   | Eclampsia (n=4)                    | All 10 had physical trigger                     | 31.8         | 70% in 1st month          | 5 patients with atypical forms  | N/A                             | -                                                | -                                        | ECMO, major bleeding and OTI     | 1095             |
| 34         | Yang et al (n=16) | 35*   | Asian (korean)   | N/A   | Hypertensive pregnancy state (n=9) | -                                               | 37           | 100% within the 1st month | 11 patients with atypical forms | N/A                             | -                                                | -                                        | -                                | -                |

**Supplementary Table S1.** Baseline characteristics and clinical course from the analyzed peripartum population (the literature peripartum TTS and RETAKO peripartum TTS). \* Mean of combined data from the studies of Kim et al (3) and Yang et al (1). \*\*LVEF recovered within the first 1 month is labeled as "1"; within the first 3 months as "3"; and from the third to sixth month as ">3". Abbreviations: CVRFs = cardiovascular risk factors; DIC = disseminated intravascular coagulopathy; ECMO = extracorporeal membrane oxygenation; HELP = hemolysis, elevated liver enzymes, and low platelet count; IABP = intra-aortic balloon pump; LVAD = left ventricular assist device; LVEF = left ventricular ejection fraction; N/A = non-applicable; OTI = orotracheal intubation; TWI = T-wave inversion; STD = ST-segment depression; STE = ST-segment elevation; VT = ventricular tachycardia; VF = ventricular fibrillation.
